A program of the American Psychiatric Association. Supported by a grant from AHRQ.

**FREE**

# CME ONLINE PROGRAM

**Earn up to 25 AMA PRA Category 1 credits™**

## Prescribing of atypical antipsychotics has expanded beyond the

FDA approved indications, but their effectiveness, benefits, and adverse effects in off-label uses are not well understood. How do atypical antipsychotic medications compare with other drugs for “off-label” indications? This program can help!

The Agency for Healthcare Research and Quality (AHRQ) has awarded the APA a grant (#5R18HS021944) to create and offer physicians a **FREE CME program** to educate them

about evidence for effectiveness of atypical (second generation) antipsychotics reviewed in the **2011 AHRQ Report**. The goal of the program is to help physicians make informed treatment decisions when using these medications “off label.”

This free CME program begins with a Self-Assessment test. A series of 10 multimedia eFocus modules will be released over 2014 (with CME and MOC Self-assessment credit). The self-assessment test is available at **www.APAeducation.org**. Completion of the entire program

offers up to 25 *AMA PRA Category 1 credits*. Part of APA'S FOCUS program of lifelong learning, it is also approved by ABPN for MOC Part 2, Self-Assessment credit.

## Visit

**www.psychiatry.org/APAefocus** for more

information and to sign up to receive updates on when program activities are released to ensure you don't miss out on each opportunity to learn and earn free CME credits.

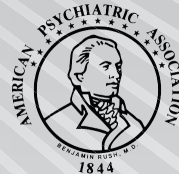

## Self-Assessment

### Coming throughout 2014 – eFOCUS Clinical Vignettes:

- Insomnia
- Eating Disorders
- PTSD
- Depression
- Dementia
- Substance Abuse
- OCD
- Anxiety
- Personality Disorders
- Side-Effects of Atypical Antipsychotics

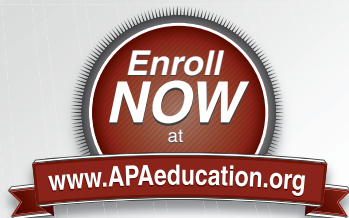

## Connect via Social Media

**Use #APAefocus**

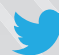

Follow us on Twitter  
[www.twitter/APAPsychiatric](http://www.twitter/APAPsychiatric)

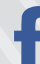

Join the conversation on Facebook  
[www.facebook.com/AmericanPsychiatricAssociation](http://www.facebook.com/AmericanPsychiatricAssociation)

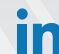

Link to us on LinkedIn  
[www.linkedin.com/company/american-psychiatric-association](http://www.linkedin.com/company/american-psychiatric-association)
