# FOCUS

THE JOURNAL OF LIFELONG LEARNING IN PSYCHIATRY



## *Psychotherapy: New Evidence and New Approaches*

*Guest Editor: Holly A. Swartz, M.D.*

### IN CLINICAL SYNTHESIS:

Psychotherapy for Bipolar Disorder in Adults:  
A Review of the Evidence

*Holly A. Swartz, M.D.  
Joshua Swanson*

Cognitive-Behavioral Therapy: Next Generation of Treatments

*Elizabeth A. Mundy, Ph.D.  
Stefan G. Hofmann, Ph.D.*

Interpersonal Psychotherapy: Healing with a Relational Focus

*Paula Ravitz, M.D., F.R.C.P.C.  
Priya Watson, M.D., F.R.C.P.C.*

What is Supportive Psychotherapy?

*John C. Markowitz, M.D.*

Psychotherapy and Neuroimaging

*Jay C. Fournier, Ph.D.  
Rebecca B. Price, Ph.D.*

AND INFLUENTIAL PUBLICATIONS...
